# Supplementary material
Source: publisher figshare collection journal article supplement (https://acs.figshare.com/ndownloader/files/5458580)
Supplement: Supplementary file 1 [file 5458580]

*Online supporting information for:*

# Mechanism of Hydrogen Evolution Reaction on 1T-MoS<sub>2</sub> from First Principles

Qing Tang and De-en Jiang\*

Department of Chemistry, University of California, Riverside, CA 92521, USA

\*To whom correspondence should be addressed. E-mail: [de-en.jiang@ucr.edu](mailto:de-en.jiang@ucr.edu).

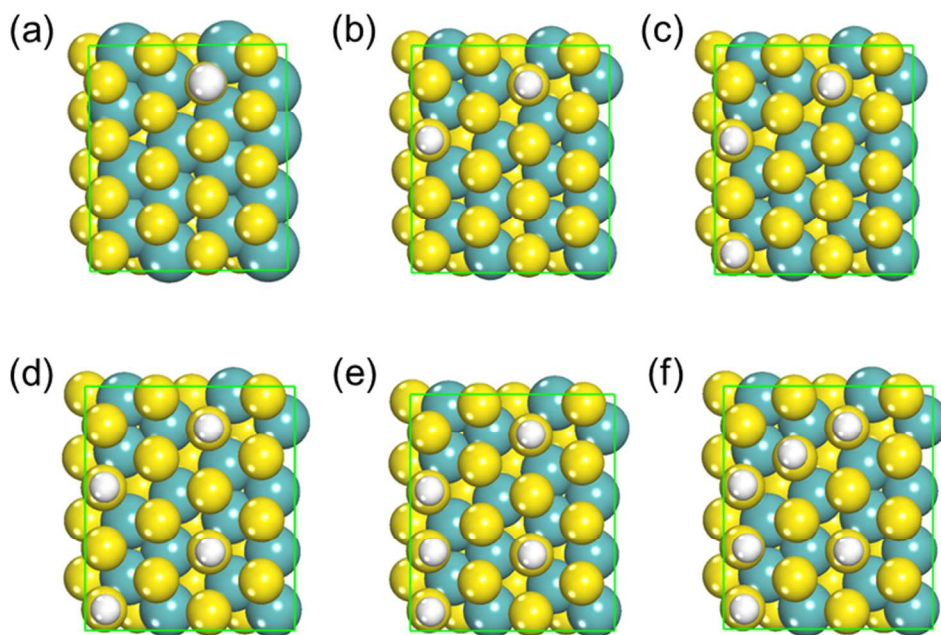

Figure S1. The optimized adsorption geometries of H on 1T MoS<sub>2</sub> surface at different H coverage: (a) 6.25 %, (b) 12.5%, (c) 18.75%, (d) 25%, (e) 31.25% and (f) 37.5%.

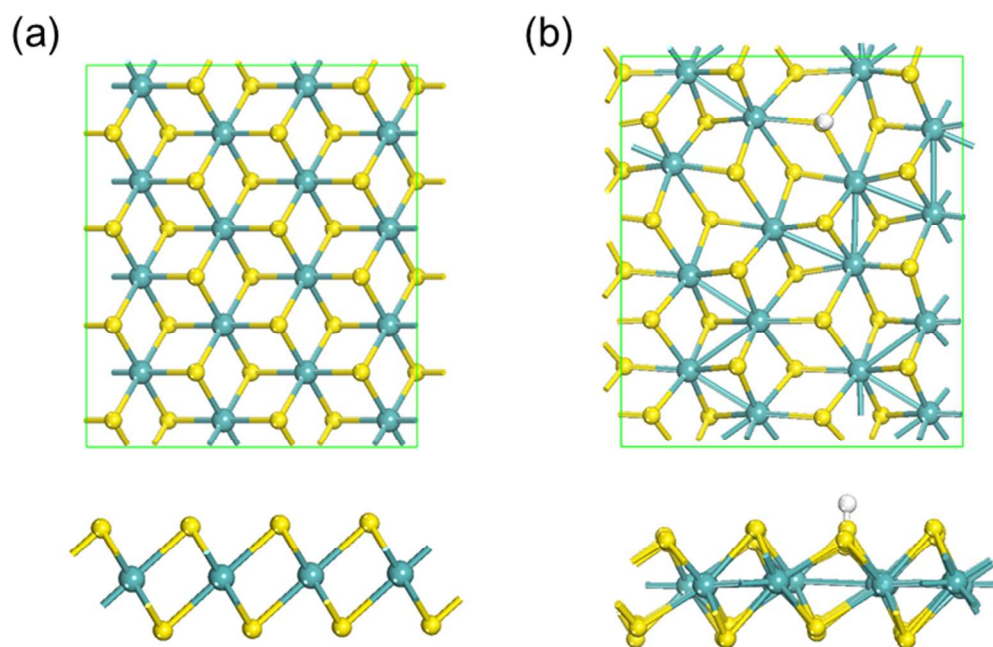

Figure S2. Top and side view of the perfect 1T MoS<sub>2</sub> (a) and the distorted 1T MoS<sub>2</sub> after adsorption of the first H.
